# Supplementary material for: Microbial Detection and Quantification of Low-Biomass Water Samples Using an International Space Station Smart Sample Concentrator
Source: Microorganisms. 2023 Sep 13;11(9):2310. doi: 10.3390/microorganisms11092310 (PMC10537578; doi:10.3390/microorganisms11092310)
Supplement: Supplementary file 1 [file microorganisms-11-02310-s001.zip]

Archive with 5 entries (5 files):
- microorganisms-2534595-supplementary-figures.pdf
- Supplementary File 1 WL2-Parra Final.pdf
- Supplementary Table S1_qPCR_results.xlsx
- Supplementary Table S2_CFU_results.xlsx
- Supplementary Videos 1-4.zip
