# Supplementary material for: Microbial Detection and Quantification of Low-Biomass Water Samples Using an International Space Station Smart Sample Concentrator
Source: Microorganisms. 2023 Sep 13;11(9):2310. doi: 10.3390/microorganisms11092310 (PMC10537578; doi:10.3390/microorganisms11092310)
Supplement: Supplementary file 1 [file microorganisms-11-02310-s001.zip › microorganisms-2534595-supplementary-figures.pdf]

## 1. Supplementary Figures

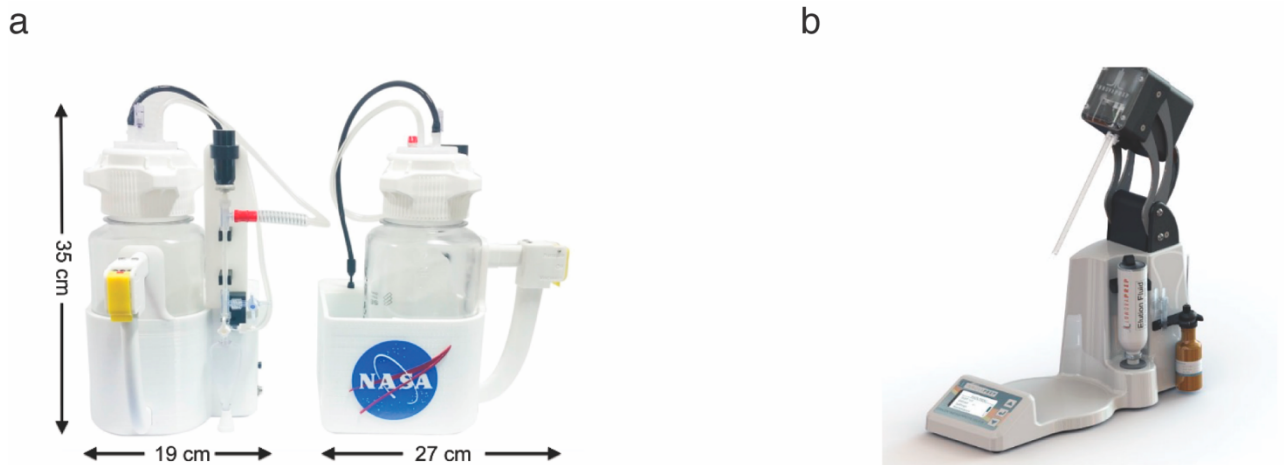

**Figure S1.** The International Space Station Smart Sample Concentrator (iSSC) (a) and Concentrating Pipette Select (b). Presented are concentrating devices developed by InnovaPrep for application on Earth (b) and in microgravity (a).

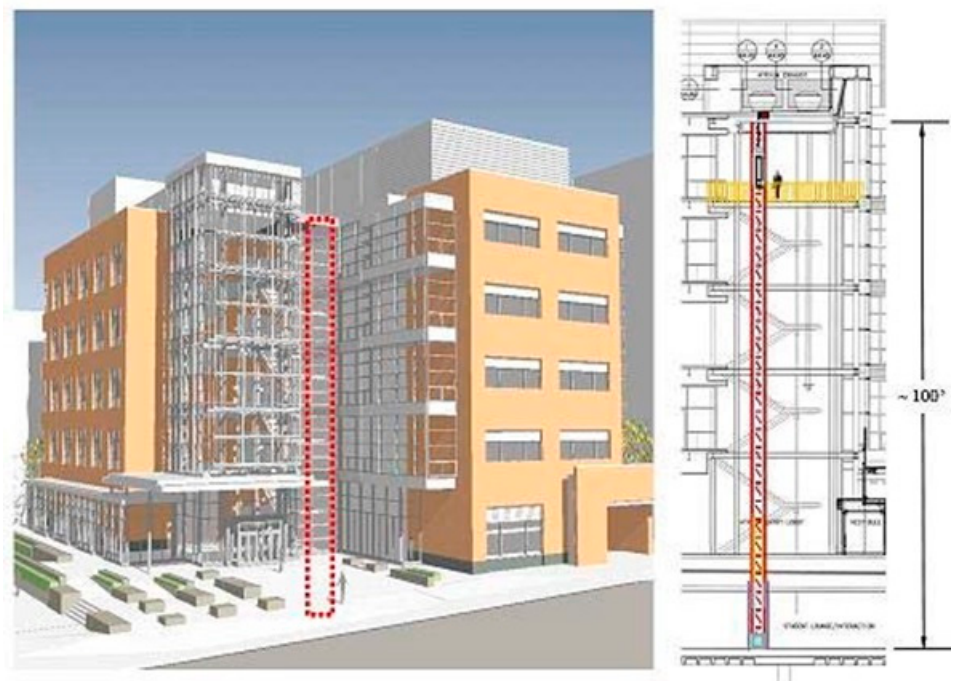

**Figure S2.** The Dryden drop tower set up. Presented is the setup of the Dryden drop tower used for testing the iSSC microgravity compatibility.

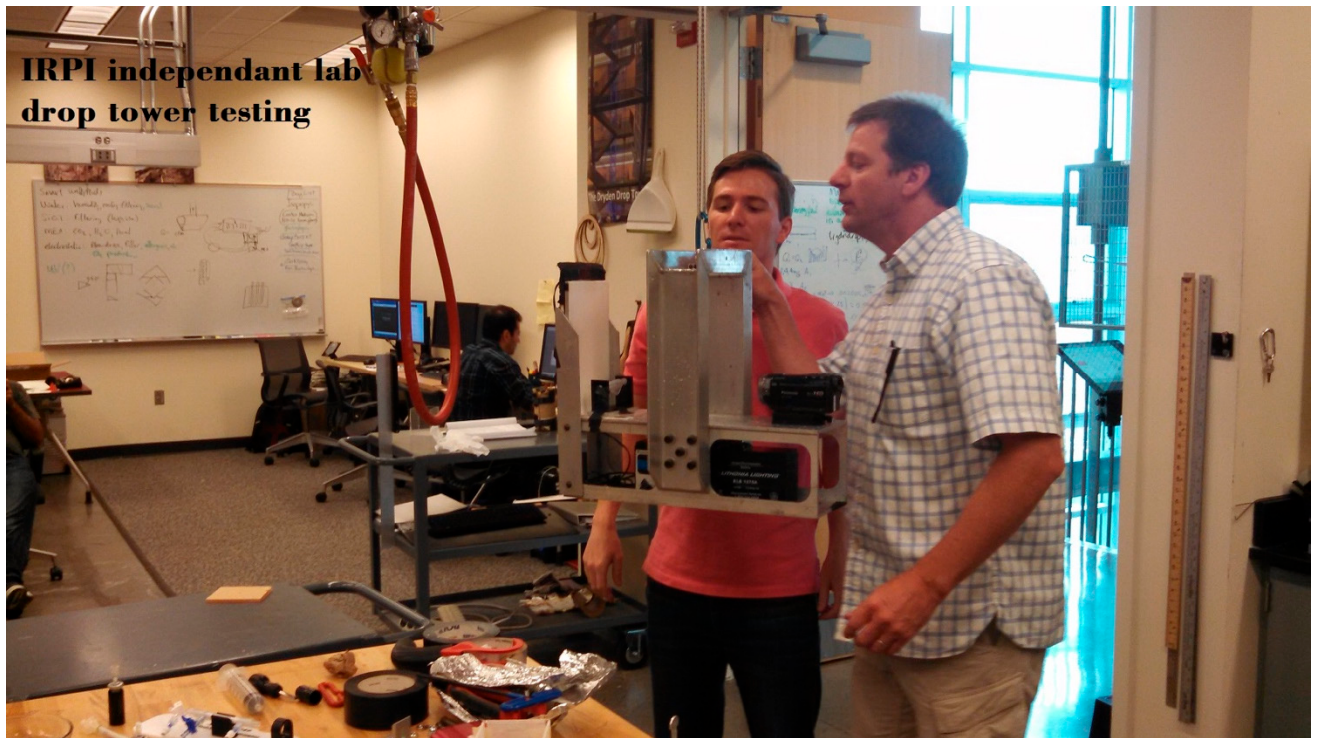

Figure S3. IRPI independant lab drop tower testing.

## 2. Supplementary Tables

**Supplementary Table 1.** qPCR results for *Sphingomonas paucimobilis*, *Ralstonia pickettii* and *Cupriavidus basilensis*

**Supplementary Table 2.** CFU results for *Sphingomonas paucimobilis*, *Ralstonia pickettii* and *Cupriavidus basilensis*

Excel files provided

## 3. Supplementary Videos

**Supplementary Video 1. IRPI Dryden Drop Tower.** The video shows the drop of the iSSC system during the impact testing.

**Supplementary Video 2. Volume comparison.** The viedo shows the comparison of the volumes and their behavior during the drop.

**Supplementary Video 3. The behavior of liquid in a single CFAC during the impact.** The video shows the behavior of the liquid during the drop in a single CFAC.

**Supplementary Video 4. The behavior of liquid in a single CFAC during the impact in different orientations.** The video shows the behavior of the liquid during the drop in a single CFAC in different orientations.

Video files provided
