# Supplementary material for: Microbial Detection and Quantification of Low-Biomass Water Samples Using an International Space Station Smart Sample Concentrator
Source: Microorganisms. 2023 Sep 13;11(9):2310. doi: 10.3390/microorganisms11092310 (PMC10537578; doi:10.3390/microorganisms11092310)
Supplement: Supplementary file 1 [file microorganisms-11-02310-s001.zip › Supplementary Table S1_qPCR_results.xlsx]

## Sheet: Sphingomonas paucimobilis
Table S1. qPCR results for Sphingomonas paucimobilis, Ralstonia pickettii and Cupriavidus basilensis
Well Position	Sample	Quantity	Cq	Cq Mean	Cq Confidence	Cq SD	Copy No in 9.5uL	Copy No in 50 ul (Maxwell)	CFAC or inoculum volume	Volume used for DNA extraction	Constant to back calculate the value	Copy number per concentrate
A1	100000	100000	24.2251	24.2349	0.993502	0.115961
A2	100000	100000	24.1242	24.2349	0.992292	0.115961
A3	100000	100000	24.3555	24.2349	0.991329	0.115961
A4	10000	10000	27.7243	27.726	0.992902	0.0565187
A5	10000	10000	27.7834	27.726	0.991898	0.0565187
A6	10000	10000	27.6704	27.726	0.994113	0.0565187
A7	1000	1000	33.1435	33.2082	0.988037	0.177181
A8	1000	1000	33.0725	33.2082	0.986712	0.177181
A9	1000	1000	33.4087	33.2082	0.986339	0.177181
A10	100	100	37.0835	36.3571	0.950323	0.632524
A11	100	100	35.9284	36.3571	0.980171	0.632524
A12	100	100	36.0594	36.3571	0.971778	0.632524
B1	10	10	38.6217	38.6217	0.471275
B2	10	10	Undetermined	38.6217	0
B3	10	10	Undetermined	38.6217	0
B4	1	1	Undetermined		0																						qPCR
B5	1	1	Undetermined		0
B6	1	1	Undetermined		0											CFAC	inoculum	delta Cq			CFAC	inoculum	% recovery				Rep 1	Rep 2	Rep 3
B7	Sp1 CFAC 10^5 Mx	9176	28.4361	28.4137	0.989226	0.0462389	9176	48294.7	400	80	5	241474		Biological replicate 1	Sp1 CFAC 10^5 Mx	28.4361	27.076	1.36005	~100-1000	Sp1 CFAC 10^5 Mx	241474	1.06971e+06	0.225738	0.233534		10^2	0.824899	0.459466		0.642183
B8	Sp1 CFAC 10^5 Mx	9590.44	28.3605	28.4137	0.990781	0.0462389	9590.44	50476	400	80	5	252380			Sp1 CFAC 10^5 Mx	28.3605	27.1364	1.22408		Sp1 CFAC 10^5 Mx	252380	1.03258e+06	0.244418			10^3	0.150794	0.374996	1.70351	0.7431
B9	Sp1 CFAC 10^5 Mx	9130.99	28.4445	28.4137	0.992073	0.0462389	9130.99	48057.8	400	80	5	240289			Sp1 CFAC 10^5 Mx	28.4445	27.1197	1.32474		Sp1 CFAC 10^5 Mx	240289	1.04271e+06	0.230446			10^4	0.240777	0.423951	0.643396	0.436041
B10	Sp1 CFAC 10^4 Mx	771.28	32.6712	32.7234	0.993208	0.113402	771.28	4059.37	370	55	6.72727	27308.5			Sp1 CFAC 10^4 Mx	32.6712	31.0061	1.66503	~100	Sp1 CFAC 10^4 Mx	27308.5	107466	0.254113	0.240777		10^5	0.233534	0.239176	0.199177	0.223963
B11	Sp1 CFAC 10^4 Mx	782.928	32.6455	32.7234	0.989518	0.113402	782.928	4120.67	370	55	6.72727	27720.9			Sp1 CFAC 10^4 Mx	32.6455	31.0073	1.63818		Sp1 CFAC 10^4 Mx	27720.9	107390	0.258134
B12	Sp1 CFAC 10^4 Mx	693.281	32.8535	32.7234	0.983187	0.113402	693.281	3648.85	370	55	6.72727	24546.8			Sp1 CFAC 10^4 Mx	32.8535	30.863	1.99046		Sp1 CFAC 10^4 Mx	24546.8	116844	0.210082
C1	Sp1 CFAC 10^3 Mx	137.726	35.6176	35.6481	0.972712	0.314899	137.726	724.874	430	100	4.3	3116.96			Sp1 CFAC 10^3 Mx	35.6176	33.8844	1.73313	10-100	Sp1 CFAC 10^3 Mx	3116.96	19969.4	0.156086	0.150794
C2	Sp1 CFAC 10^3 Mx	111.609	35.9772	35.6481	0.975074	0.314899	111.609	587.415	430	100	4.3	2525.88			Sp1 CFAC 10^3 Mx	35.9772	33.8994	2.07774		Sp1 CFAC 10^3 Mx	2525.88	19795.1	0.127602
C3	Sp1 CFAC 10^3 Mx	161.087	35.3496	35.6481	0.978756	0.314899	161.087	847.828	430	100	4.3	3645.66			Sp1 CFAC 10^3 Mx	35.3496	33.7493	1.60028		Sp1 CFAC 10^3 Mx	3645.66	21611.1	0.168694
C4	Sp1 CFAC 10^2 Mx	24.1859	38.5925	37.5932	0.504347	0.866724	24.1859	127.294	450	55	8.18182	1041.5			Sp1 CFAC 10^2 Mx	38.5925	36.3122	2.28037	less than 10	Sp1 CFAC 10^2 Mx	1041.5	4829.21	0.215667	0.824899
C5	Sp1 CFAC 10^2 Mx	56.5232	37.1407	37.5932	0.941822	0.866724	56.5232	297.49	450	55	8.18182	2434.01			Sp1 CFAC 10^2 Mx	37.1407	37.9615	-0.820818		Sp1 CFAC 10^2 Mx	2434.01	1840.93	1.32216
C6	Sp1 CFAC 10^2 Mx	59.7299	37.0464	37.5932	0.964443	0.866724	59.7299	314.368	450	55	8.18182	2572.1			Sp1 CFAC 10^2 Mx	37.0464	37.278	-0.231669		Sp1 CFAC 10^2 Mx	2572.1	2745.42	0.936869
C7	Sp1 incl 10^5 Mx	20324.5	27.076	27.1107	0.993741	0.0312011	20324.5	106971	1000	100	10	1.06971e+06											#DIV/0!
C8	Sp1 incl 10^5 Mx	19618.9	27.1364	27.1107	0.99047	0.0312011	19618.9	103258	1000	100	10	1.03258e+06		Biological replicate 2	Sp2 CFAC 10^5 Mx	29.2784	28.2324	1.04596	~100-1000	Sp2 CFAC 10^5 Mx	126906	544027	0.233272	0.239176
C9	Sp1 incl 10^5 Mx	19811.5	27.1197	27.1107	0.992023	0.0312011	19811.5	104271	1000	100	10	1.04271e+06			Sp2 CFAC 10^5 Mx	29.3338	28.2679	1.06585		Sp2 CFAC 10^5 Mx	122861	532848	0.230574
C10	Sp1 incl 10^4 Mx	2041.85	31.0061	30.9588	0.98897	0.082963	2041.85	10746.6	1000	100	10	107466			Sp2 CFAC 10^5 Mx	29.2467	28.3442	0.902499		Sp2 CFAC 10^5 Mx	129279	509609	0.253683
C11	Sp1 incl 10^4 Mx	2040.4	31.0073	30.9588	0.989989	0.082963	2040.4	10739	1000	100	10	107390			Sp2 CFAC 10^4 Mx	33.0427	32.6173	0.425344	~100	Sp2 CFAC 10^4 Mx	18200.4	41891.3	0.434467	0.423951
C12	Sp1 incl 10^4 Mx	2220.03	30.863	30.9588	0.990667	0.082963	2220.03	11684.4	1000	100	10	116844			Sp2 CFAC 10^4 Mx	32.8559	32.3621	0.493816		Sp2 CFAC 10^4 Mx	20300.8	48634.5	0.417416
D1	Sp1 incl 10^3 Mx	379.42	33.8844	33.8444	0.979836	0.0826807	379.42	1996.94	1000	100	10	19969.4			Sp2 CFAC 10^4 Mx	32.9702	32.4868	0.483384		Sp2 CFAC 10^4 Mx	18988.2	45213.3	0.41997
D2	Sp1 incl 10^3 Mx	376.106	33.8994	33.8444	0.987394	0.0826807	376.106	1979.51	1000	100	10	19795.1			Sp2 CFAC 10^3 Mx	36.1969	35.1245	1.07243	10-100	Sp2 CFAC 10^3 Mx	3475.2	9670.98	0.359344	0.374996
D3	Sp1 incl 10^3 Mx	410.611	33.7493	33.8444	0.985362	0.0826807	410.611	2161.11	1000	100	10	21611.1			Sp2 CFAC 10^3 Mx	35.7188	35.1416	0.577246		Sp2 CFAC 10^3 Mx	4596.02	9574.72	0.480016
D4	Sp1 incl 10^2 Mx	91.7551	36.3122	37.1839	0.972102	0.828711	91.7551	482.921	1000	100	10	4829.21			Sp2 CFAC 10^3 Mx	36.3369	34.8718	1.46509		Sp2 CFAC 10^3 Mx	3202.13	11210.9	0.285628
D5	Sp1 incl 10^2 Mx	34.9777	37.9615	37.1839	0.929871	0.828711	34.9777	184.093	1000	100	10	1840.93			Sp2 CFAC 10^2 Mx	38.5805	36.9524	1.62807	less than 10	Sp2 CFAC 10^2 Mx	871.727	3321.22	0.262472	0.459466
D6	Sp1 incl 10^2 Mx	52.163	37.278	37.1839	0.939065	0.828711	52.163	274.542	1000	100	10	2745.42			Sp2 CFAC 10^2 Mx	39.8149	39.4195	0.395309		Sp2 CFAC 10^2 Mx	423.571	784.875	0.539667
D7	Sp2 CFAC 10^5 Mx	5607.48	29.2784	29.2863	0.99094	0.0440789	5607.48	29513	430	100	4.3	126906			Sp2 CFAC 10^2 Mx	37.742	37.4589	0.283106		Sp2 CFAC 10^2 Mx	1423.33	2469.94	0.57626
D8	Sp2 CFAC 10^5 Mx	5428.74	29.3338	29.2863	0.989437	0.0440789	5428.74	28572.3	430	100	4.3	122861											#DIV/0!
D9	Sp2 CFAC 10^5 Mx	5712.34	29.2467	29.2863	0.991524	0.0440789	5712.34	30064.9	430	100	4.3	129279		Biological replicate 3	Sp3 CFAC 10^5 Mx	31.3953	29.5341	1.86115		Sp3 CFAC 10^5 Mx	48789.2	254133	0.191983	0.199177
D10	Sp2 CFAC 10^4 Mx	620.679	33.0427	32.9563	0.98369	0.0941743	620.679	3266.73	390	70	5.57143	18200.4			Sp3 CFAC 10^5 Mx	31.4053	29.5759	1.82939		Sp3 CFAC 10^5 Mx	48503.3	247997	0.195581
D11	Sp2 CFAC 10^4 Mx	692.31	32.8559	32.9563	0.98856	0.0941743	692.31	3643.73	390	70	5.57143	20300.8			Sp3 CFAC 10^5 Mx	31.3321	29.6241	1.70799		Sp3 CFAC 10^5 Mx	50626.4	241114	0.209968
D12	Sp2 CFAC 10^4 Mx	647.546	32.9702	32.9563	0.988948	0.0941743	647.546	3408.14	390	70	5.57143	18988.2			Sp3 CFAC 10^4 Mx	32.0165	32.2007	-0.184206		Sp3 CFAC 10^4 Mx	34525.1	53447.8	0.645958	0.643396
E1	Sp2 CFAC 10^3 Mx	98.151	36.1969	36.0842	0.967727	0.324067	98.151	516.584	370	55	6.72727	3475.2			Sp3 CFAC 10^4 Mx	32.0747	31.9311	0.143584		Sp3 CFAC 10^4 Mx	33369.9	62573.2	0.533294
E2	Sp2 CFAC 10^3 Mx	129.806	35.7188	36.0842	0.970978	0.324067	129.806	683.192	370	55	6.72727	4596.02			Sp3 CFAC 10^4 Mx	31.8608	32.3025	-0.441744		Sp3 CFAC 10^4 Mx	37815.2	50357.4	0.750936
E3	Sp2 CFAC 10^3 Mx	90.4386	36.3369	36.0842	0.981809	0.324067	90.4386	475.993	370	55	6.72727	3202.13			Sp3 CFAC 10^3 Mx	32.2221	35.0015	-2.77938		Sp3 CFAC 10^3 Mx	15306.6	10391.9	1.47293	1.70351
E4	Sp2 CFAC 10^2 Mx	24.3571	38.5805	38.7124	0.507931	1.04272	24.3571	128.195	680	100	6.8	871.727			Sp3 CFAC 10^3 Mx	32.109	35.1513	-3.04231		Sp3 CFAC 10^3 Mx	16353.1	9520.28	1.71771
E5	Sp2 CFAC 10^2 Mx	11.8351	39.8149	38.7124	0	1.04272	11.8351	62.2899	680	100	6.8	423.571			Sp3 CFAC 10^3 Mx	32.3053	35.5379	-3.23262		Sp3 CFAC 10^3 Mx	14579.9	7594.13	1.91989
E6	Sp2 CFAC 10^2 Mx	39.7694	37.742	38.7124	0.945893	1.04272	39.7694	209.313	680	100	6.8	1423.33			Sp3 CFAC 10^2 Mx	Undetermined	Undetermined	#VALUE!		Sp3 CFAC 10^2 Mx	#VALUE!	#VALUE!	#VALUE!	#VALUE!
E7	Sp2 incl 10^5 Mx	10336.5	28.2324	28.2815	0.988507	0.0571114	10336.5	54402.7	1000	100	10	544027			Sp3 CFAC 10^2 Mx	Undetermined	39.3231	#VALUE!		Sp3 CFAC 10^2 Mx	#VALUE!	830.406	#VALUE!
E8	Sp2 incl 10^5 Mx	10124.1	28.2679	28.2815	0.994801	0.0571114	10124.1	53284.8	1000	100	10	532848			Sp3 CFAC 10^2 Mx	Undetermined	Undetermined	#VALUE!		Sp3 CFAC 10^2 Mx	#VALUE!	#VALUE!	#VALUE!
E9	Sp2 incl 10^5 Mx	9682.57	28.3442	28.2815	0.993292	0.0571114	9682.57	50960.9	1000	100	10	509609
E10	Sp2 incl 10^4 Mx	795.934	32.6173	32.4888	0.989923	0.127643	795.934	4189.13	1000	100	10	41891.3
E11	Sp2 incl 10^4 Mx	924.055	32.3621	32.4888	0.987864	0.127643	924.055	4863.45	1000	100	10	48634.5
E12	Sp2 incl 10^4 Mx	859.052	32.4868	32.4888	0.98629	0.127643	859.052	4521.33	1000	100	10	45213.3
F1	Sp2 incl 10^3 Mx	183.749	35.1245	35.046	0.97919	0.151075	183.749	967.098	1000	100	10	9670.98
F2	Sp2 incl 10^3 Mx	181.92	35.1416	35.046	0.973297	0.151075	181.92	957.472	1000	100	10	9574.72
F3	Sp2 incl 10^3 Mx	213.006	34.8718	35.046	0.977616	0.151075	213.006	1121.09	1000	100	10	11210.9
F4	Sp2 incl 10^2 Mx	63.1032	36.9524	37.9436	0.976947	1.30305	63.1032	332.122	1000	100	10	3321.22
F5	Sp2 incl 10^2 Mx	14.9126	39.4195	37.9436	0	1.30305	14.9126	78.4875	1000	100	10	784.875
F6	Sp2 incl 10^2 Mx	46.9289	37.4589	37.9436	0.937715	1.30305	46.9289	246.994	1000	100	10	2469.94
F7	Sp3 CFAC 10^5 Mx	1626.31	31.3953	31.3776	0.988515	0.0397195	1626.31	8559.51	570	100	5.7	48789.2
F8	Sp3 CFAC 10^5 Mx	1616.78	31.4053	31.3776	0.988048	0.0397195	1616.78	8509.36	570	100	5.7	48503.3
F9	Sp3 CFAC 10^5 Mx	1687.55	31.3321	31.3776	0.988965	0.0397195	1687.55	8881.82	570	100	5.7	50626.4
F10	Sp3 CFAC 10^4 Mx	1130.99	32.0165	31.984	0.988308	0.110578	1130.99	5952.6	580	100	5.8	34525.1
F11	Sp3 CFAC 10^4 Mx	1093.15	32.0747	31.984	0.98559	0.110578	1093.15	5753.44	580	100	5.8	33369.9
F12	Sp3 CFAC 10^4 Mx	1238.77	31.8608	31.984	0.988018	0.110578	1238.77	6519.86	580	100	5.8	37815.2
G1	Sp3 CFAC 10^3 Mx	1002.84	32.2221	32.2122	0.986304	0.0985268	1002.84	5278.13	290	100	2.9	15306.6
G2	Sp3 CFAC 10^3 Mx	1071.41	32.109	32.2122	0.986794	0.0985268	1071.41	5639	290	100	2.9	16353.1
G3	Sp3 CFAC 10^3 Mx	955.233	32.3053	32.2122	0.990248	0.0985268	955.233	5027.54	290	100	2.9	14579.9
G4	Sp3 CFAC 10^2 Mx		Undetermined		0			#VALUE!	430	100	4.3	#VALUE!
G5	Sp3 CFAC 10^2 Mx		Undetermined		0			#VALUE!	430	100	4.3	#VALUE!
G6	Sp3 CFAC 10^2 Mx		Undetermined		0			#VALUE!	430	100	4.3	#VALUE!
G7	Sp3 incl 10^5 Mx	4828.54	29.5341	29.578	0.993259	0.0450068	4828.54	25413.3	1000	100	10	254133
G8	Sp3 incl 10^5 Mx	4711.94	29.5759	29.578	0.99078	0.0450068	4711.94	24799.7	1000	100	10	247997
G9	Sp3 incl 10^5 Mx	4581.17	29.6241	29.578	0.980353	0.0450068	4581.17	24111.4	1000	100	10	241114
G10	Sp3 incl 10^4 Mx	1015.51	32.2007	32.1448	0.98829	0.191933	1015.51	5344.78	1000	100	10	53447.8
G11	Sp3 incl 10^4 Mx	1188.89	31.9311	32.1448	0.986209	0.191933	1188.89	6257.32	1000	100	10	62573.2
G12	Sp3 incl 10^4 Mx	956.791	32.3025	32.1448	0.987236	0.191933	956.791	5035.74	1000	100	10	50357.4
H1	Sp3 incl 10^3 Mx	197.446	35.0015	35.2303	0.9628	0.276784	197.446	1039.19	1000	100	10	10391.9
H2	Sp3 incl 10^3 Mx	180.885	35.1513	35.2303	0.982265	0.276784	180.885	952.028	1000	100	10	9520.28
H3	Sp3 incl 10^3 Mx	144.288	35.5379	35.2303	0.968288	0.276784	144.288	759.413	1000	100	10	7594.13
H4	Sp3 incl 10^2 Mx		Undetermined	39.3231	0			#VALUE!	1000	100	10	#VALUE!
H5	Sp3 incl 10^2 Mx	15.7777	39.3231	39.3231	0		15.7777	83.0406	1000	100	10	830.406
H6	Sp3 incl 10^2 Mx		Undetermined	39.3231	0			#VALUE!	1000	100	10	#VALUE!
H7	MX control		Undetermined		0
H8	MX control		Undetermined		0
H9	MX control		Undetermined		0

## Sheet: Cupriavidus basilensis
Well Position	Sample	Quantity	Cq	Cq Mean	Cq Confidence	Cq SD	Copy No in 9.5uL	Copy No in 50 ul (Maxwell)	CFAC or inoculum volume	Volume used for DNA extraction	Constant to back calculate the value	Copy number per concentrate
A1	100000	100000	21.2627	21.149	0.70272	0.162359
A2	100000	100000	21.2213	21.149	0.706868	0.162359
A3	100000	100000	20.9631	21.149	0.705345	0.162359
A4	10000	10000	22.408	24.1843	0.750623	1.54671
A5	10000	10000	24.9108	24.1843	0.769659	1.54671
A6	10000	10000	25.234	24.1843	0.804395	1.54671
A7	1000	1000	28.3173	28.4015	0.947184	0.188371
A8	1000	1000	28.6173	28.4015	0.943901	0.188371
A9	1000	1000	28.2699	28.4015	0.963058	0.188371
A10	100	100	32.1205	32.1531	0.98771	0.100452
A11	100	100	32.073	32.1531	0.985099	0.100452
A12	100	100	32.2658	32.1531	0.98597	0.100452
B1	10	10	36.6268	35.8151	0.929582	1.0228
B2	10	10	34.6663	35.8151	0.978447	1.0228
B3	10	10	36.1522	35.8151	0.94887	1.0228
B4	1	1	Undetermined		0
B5	1	1	Undetermined		0
B6	1	1	Undetermined		0											CFAC	inoculum	delta Cq			CFAC	inoculum	% recovery				Rep 1	Rep 2	Rep 3
B7	CM1 CFAC 10^5 Mx	833.335	28.636	28.5543	0.971116	0.071247	833.335	4385.97	490	100	4.9	21491.3		Biological replicate 1	Cm1 CFAC 10^5 Mx	28.636	29.569	-0.93308	~100-1000	Cm1 CFAC 10^5 Mx	21491.3	24655.7	0.871655	0.935994		10^2	#VALUE!	#VALUE!	0.854313	#VALUE!
B8	CM1 CFAC 10^5 Mx	894.089	28.522	28.5543	0.977805	0.071247	894.089	4705.73	490	100	4.9	23058.1			Cm1 CFAC 10^5 Mx	28.522	29.6622	-1.14025		Cm1 CFAC 10^5 Mx	23058.1	23277.6	0.990571			10^3	1.03389	2.19552	2.56021	1.92987
B9	CM1 CFAC 10^5 Mx	903.545	28.5049	28.5543	0.983795	0.071247	903.545	4755.5	490	100	4.9	23301.9			Cm1 CFAC 10^5 Mx	28.5049	29.5702	-1.06525		Cm1 CFAC 10^5 Mx	23301.9	24638.4	0.945756			10^4	0.635667	0.625707	0.198138	0.486504
B10	CM1 CFAC 10^4 Mx	93.9716	32.1714	32.3586	0.980167	0.1678	93.9716	494.587	530	100	5.3	2621.31			Cm1 CFAC 10^4 Mx	32.1714	32.8643	-0.692897	~100	Cm1 CFAC 10^4 Mx	2621.31	3224.67	0.812894	0.635667		10^5	0.935994	1.06286	0.365863	0.788238
B11	CM1 CFAC 10^4 Mx	76.9273	32.4956	32.3586	0.976468	0.1678	76.9273	404.881	530	100	5.3	2145.87			Cm1 CFAC 10^4 Mx	32.4956	32.3916	0.104022		Cm1 CFAC 10^4 Mx	2145.87	4317.32	0.497037
B12	CM1 CFAC 10^4 Mx	81.172	32.4086	32.3586	0.970135	0.1678	81.172	427.221	530	100	5.3	2264.27			Cm1 CFAC 10^4 Mx	32.4086	32.6017	-0.19303		Cm1 CFAC 10^4 Mx	2264.27	3792.31	0.59707
C1	CM1 CFAC 10^3 Mx	30.0203	34.02	34.6144	0.960096	0.55141	30.0203	158.002	400	100	4	632.006			Cm1 CFAC 10^3 Mx	34.02	35.9819	-1.96187	10-100	Cm1 CFAC 10^3 Mx	632.006	470.659	1.34281	1.03389
C2	CM1 CFAC 10^3 Mx	15.325	35.1092	34.6144	0.954201	0.55141	15.325	80.6579	400	100	4	322.632			Cm1 CFAC 10^3 Mx	35.1092	35.8102	-0.700981		Cm1 CFAC 10^3 Mx	322.632	523.265	0.616574
C3	CM1 CFAC 10^3 Mx	19.5593	34.714	34.6144	0.973208	0.55141	19.5593	102.944	400	100	4	411.776			Cm1 CFAC 10^3 Mx	34.714	36.4139	-1.69985		Cm1 CFAC 10^3 Mx	411.776	360.486	1.14228
C4	CM1 CFAC 10^2 Mx		Undetermined	36.0749	0	0.19738		#VALUE!	870	100	8.7	#VALUE!			Cm1 CFAC 10^2 Mx	Undetermined	Undetermined	#VALUE!	less than 10	Cm1 CFAC 10^2 Mx	#VALUE!	#VALUE!	#VALUE!	#VALUE!
C5	CM1 CFAC 10^2 Mx	9.20328	35.9353	36.0749	0.953372	0.19738	9.20328	48.4383	870	100	8.7	421.413			Cm1 CFAC 10^2 Mx	35.9353	Undetermined	#VALUE!		Cm1 CFAC 10^2 Mx	421.413	#VALUE!	#VALUE!
C6	CM1 CFAC 10^2 Mx	7.74655	36.2144	36.0749	0.929139	0.19738	7.74655	40.7713	870	100	8.7	354.711			Cm1 CFAC 10^2 Mx	36.2144	Undetermined	#VALUE!		Cm1 CFAC 10^2 Mx	354.711	#VALUE!	#VALUE!
C7	CM1 incl 10^5 Mx	468.458	29.569	29.6005	0.986649	0.0534706	468.458	2465.57	1000	100	10	24655.7											#DIV/0!
C8	CM1 incl 10^5 Mx	442.274	29.6622	29.6005	0.980927	0.0534706	442.274	2327.76	1000	100	10	23277.6		Biological replicate 2	Cm2 CFAC 10^5 Mx	28.6795	29.8045	-1.12492	~100-1000	Cm2 CFAC 10^5 Mx	21774.7	21320.8	1.02129	1.06286
C9	CM1 incl 10^5 Mx	468.13	29.5702	29.6005	0.97968	0.0534706	468.13	2463.84	1000	100	10	24638.4			Cm2 CFAC 10^5 Mx	28.7066	29.8694	-1.16281		Cm2 CFAC 10^5 Mx	21414.2	20483.1	1.04546
C10	CM1 incl 10^4 Mx	61.2686	32.8643	32.6192	0.975736	0.236845	61.2686	322.467	1000	100	10	3224.67			Cm2 CFAC 10^5 Mx	28.7036	29.9806	-1.27702		Cm2 CFAC 10^5 Mx	21453.6	19123.7	1.12183
C11	CM1 incl 10^4 Mx	82.0291	32.3916	32.6192	0.968239	0.236845	82.0291	431.732	1000	100	10	4317.32			Cm2 CFAC 10^4 Mx	32.5085	33.0482	-0.539688	~100	Cm2 CFAC 10^4 Mx	1325.56	2878.73	0.460467	0.625707
C12	CM1 incl 10^4 Mx	72.0538	32.6017	32.6192	0.979866	0.236845	72.0538	379.231	1000	100	10	3792.31			Cm2 CFAC 10^4 Mx	32.5127	33.3941	-0.881365		Cm2 CFAC 10^4 Mx	1322.07	2325.18	0.568589
D1	CM1 incl 10^3 Mx	8.94251	35.9819	36.0687	0.954615	0.311045	8.94251	47.0659	1000	100	10	470.659			Cm2 CFAC 10^4 Mx	31.7522	33.2812	-1.52903		Cm2 CFAC 10^4 Mx	2114.25	2493.02	0.848066
D2	CM1 incl 10^3 Mx	9.94203	35.8102	36.0687	0.952797	0.311045	9.94203	52.3265	1000	100	10	523.265			Cm2 CFAC 10^3 Mx	33.9772	35.763	-1.78576	10-100	Cm2 CFAC 10^3 Mx	567.805	538.752	1.05393	2.19552
D3	CM1 incl 10^3 Mx	6.84923	36.4139	36.0687	0.909603	0.311045	6.84923	36.0486	1000	100	10	360.486			Cm2 CFAC 10^3 Mx	33.5579	35.5666	-2.00864		Cm2 CFAC 10^3 Mx	735.544	608.198	1.20938
D4	CM1 incl 10^2 Mx		Undetermined		0			#VALUE!	1000	100	10	#VALUE!			Cm2 CFAC 10^3 Mx	33.9277	38	-4.07231		Cm2 CFAC 10^3 Mx	585.43	135.414	4.32325
D5	CM1 incl 10^2 Mx		Undetermined		0			#VALUE!	1000	100	10	#VALUE!			Cm2 CFAC 10^2 Mx	Undetermined	Undetermined	#VALUE!	less than 10	Cm2 CFAC 10^2 Mx	#VALUE!	#VALUE!	#VALUE!	#VALUE!
D6	CM1 incl 10^2 Mx		Undetermined		0			#VALUE!	1000	100	10	#VALUE!			Cm2 CFAC 10^2 Mx	37.6248	Undetermined	#VALUE!		Cm2 CFAC 10^2 Mx	151.925	#VALUE!	#VALUE!
D7	CM2 CFAC 10^5 Mx	811.214	28.6795	28.6966	0.987368	0.0148302	811.214	4269.55	510	100	5.1	21774.7			Cm2 CFAC 10^2 Mx	Undetermined	Undetermined	#VALUE!		Cm2 CFAC 10^2 Mx	#VALUE!	#VALUE!	#VALUE!
D8	CM2 CFAC 10^5 Mx	797.783	28.7066	28.6966	0.987267	0.0148302	797.783	4198.86	510	100	5.1	21414.2											#DIV/0!
D9	CM2 CFAC 10^5 Mx	799.251	28.7036	28.6966	0.987876	0.0148302	799.251	4206.58	510	100	5.1	21453.6		Biological replicate 3	Cm3 CFAC 10^5 Mx	23.2124	23.1376	0.0747792		Cm3 CFAC 10^5 Mx	479835	1.30651e+06	0.367265	0.365863
D10	CM2 CFAC 10^4 Mx	76.3202	32.5085	32.2578	0.981191	0.437887	76.3202	401.685	330	100	3.3	1325.56			Cm3 CFAC 10^5 Mx	23.2435	23.1917	0.051759		Cm3 CFAC 10^5 Mx	470713	1.26359e+06	0.372521
D11	CM2 CFAC 10^4 Mx	76.1193	32.5127	32.2578	0.971217	0.437887	76.1193	400.628	330	100	3.3	1322.07			Cm3 CFAC 10^5 Mx	23.2812	23.1641	0.117057		Cm3 CFAC 10^5 Mx	459884	1.2853e+06	0.357804
D12	CM2 CFAC 10^4 Mx	121.729	31.7522	32.2578	0.986948	0.437887	121.729	640.68	330	100	3.3	2114.25			Cm3 CFAC 10^4 Mx	26.6658	25.334	1.33179		Cm3 CFAC 10^4 Mx	66597.4	336731	0.197776	0.198138
E1	CM2 CFAC 10^3 Mx	30.8237	33.9772	33.8209	0.9679	0.229129	30.8237	162.23	350	100	3.5	567.805			Cm3 CFAC 10^4 Mx	26.5415	25.2622	1.27929		Cm3 CFAC 10^4 Mx	71908.5	351991	0.204291
E2	CM2 CFAC 10^3 Mx	39.9295	33.5579	33.8209	0.973996	0.229129	39.9295	210.155	350	100	3.5	735.544			Cm3 CFAC 10^4 Mx	26.6303	25.2534	1.37687		Cm3 CFAC 10^4 Mx	68071.8	353899	0.192348
E3	CM2 CFAC 10^3 Mx	31.7805	33.9277	33.8209	0.966522	0.229129	31.7805	167.266	350	100	3.5	585.43			Cm3 CFAC 10^3 Mx	25.9845	29.1355	-3.15104		Cm3 CFAC 10^3 Mx	73244.7	32220.6	2.27323	2.56021
E4	CM2 CFAC 10^2 Mx		Undetermined	37.6248	0			#VALUE!	890	100	8.9	#VALUE!			Cm3 CFAC 10^3 Mx	26.0596	29.6119	-3.55232		Cm3 CFAC 10^3 Mx	69927.8	24011.9	2.91221
E5	CM2 CFAC 10^2 Mx	3.24334	37.6248	37.6248	0.86868		3.24334	17.0702	890	100	8.9	151.925			Cm3 CFAC 10^3 Mx	25.9554	29.2574	-3.30196		Cm3 CFAC 10^3 Mx	74572.6	29886.5	2.49519
E6	CM2 CFAC 10^2 Mx		Undetermined	37.6248	0			#VALUE!	890	100	8.9	#VALUE!			Cm3 CFAC 10^2 Mx	27.3951	28.2031	-0.808014		Cm3 CFAC 10^2 Mx	48116.9	57293.8	0.839827	0.854313
E7	CM2 incl 10^5 Mx	405.095	29.8045	29.8848	0.984026	0.0890956	405.095	2132.08	1000	100	10	21320.8			Cm3 CFAC 10^2 Mx	27.3188	28.1749	-0.856104		Cm3 CFAC 10^2 Mx	50436.7	58299.4	0.865133
E8	CM2 incl 10^5 Mx	389.178	29.8694	29.8848	0.980052	0.0890956	389.178	2048.31	1000	100	10	20483.1			Cm3 CFAC 10^2 Mx	27.3427	28.1854	-0.842652		Cm3 CFAC 10^2 Mx	49697.7	57924.2	0.857978
E9	CM2 incl 10^5 Mx	363.351	29.9806	29.8848	0.975735	0.0890956	363.351	1912.37	1000	100	10	19123.7
E10	CM2 incl 10^4 Mx	54.6959	33.0482	33.2412	0.984939	0.176416	54.6959	287.873	1000	100	10	2878.73
E11	CM2 incl 10^4 Mx	44.1784	33.3941	33.2412	0.968971	0.176416	44.1784	232.518	1000	100	10	2325.18
E12	CM2 incl 10^4 Mx	47.3674	33.2812	33.2412	0.96439	0.176416	47.3674	249.302	1000	100	10	2493.02
F1	CM2 incl 10^3 Mx	10.2363	35.763	36.4432	0.951476	1.35182	10.2363	53.8752	1000	100	10	538.752
F2	CM2 incl 10^3 Mx	11.5558	35.5666	36.4432	0.960301	1.35182	11.5558	60.8198	1000	100	10	608.198
F3	CM2 incl 10^3 Mx	2.57287	38	36.4432	0.82402	1.35182	2.57287	13.5414	1000	100	10	135.414
F4	CM2 incl 10^2 Mx		Undetermined		0			#VALUE!	1000	100	10	#VALUE!
F5	CM2 incl 10^2 Mx		Undetermined		0			#VALUE!	1000	100	10	#VALUE!
F6	CM2 incl 10^2 Mx		Undetermined		0			#VALUE!	1000	100	10	#VALUE!
F7	CM3 CFAC 10^5 Mx	23703.9	23.2124	23.2457	0.992812	0.0344515	23703.9	124757	300	78	3.84615	479835
F8	CM3 CFAC 10^5 Mx	23253.2	23.2435	23.2457	0.987112	0.0344515	23253.2	122385	300	78	3.84615	470713
F9	CM3 CFAC 10^5 Mx	22718.3	23.2812	23.2457	0.984431	0.0344515	22718.3	119570	300	78	3.84615	459884
F10	CM3 CFAC 10^4 Mx	2811.89	26.6658	26.6125	0.983582	0.064028	2811.89	14799.4	450	100	4.5	66597.4
F11	CM3 CFAC 10^4 Mx	3036.13	26.5415	26.6125	0.978914	0.064028	3036.13	15979.7	450	100	4.5	71908.5
F12	CM3 CFAC 10^4 Mx	2874.14	26.6303	26.6125	0.982123	0.064028	2874.14	15127.1	450	100	4.5	68071.8
G1	CM3 CFAC 10^3 Mx	4282	25.9845	25.9998	0.971095	0.0537534	4282	22536.8	260	80	3.25	73244.7
G2	CM3 CFAC 10^3 Mx	4088.08	26.0596	25.9998	0.978043	0.0537534	4088.08	21516.2	260	80	3.25	69927.8
G3	CM3 CFAC 10^3 Mx	4359.63	25.9554	25.9998	0.986179	0.0537534	4359.63	22945.4	260	80	3.25	74572.6
G4	CM3 CFAC 10^2 Mx	1792.59	27.3951	27.3522	0.981789	0.0390132	1792.59	9434.68	510	100	5.1	48116.9
G5	CM3 CFAC 10^2 Mx	1879.01	27.3188	27.3522	0.984454	0.0390132	1879.01	9889.55	510	100	5.1	50436.7
G6	CM3 CFAC 10^2 Mx	1851.48	27.3427	27.3522	0.987473	0.0390132	1851.48	9744.64	510	100	5.1	49697.7
G7	CM3 incl 10^5 Mx	24823.7	23.1376	23.1645	0.987849	0.0270595	24823.7	130651	1000	100	10	1.30651e+06
G8	CM3 incl 10^5 Mx	24008.2	23.1917	23.1645	0.987646	0.0270595	24008.2	126359	1000	100	10	1.26359e+06
G9	CM3 incl 10^5 Mx	24420.7	23.1641	23.1645	0.984379	0.0270595	24420.7	128530	1000	100	10	1.2853e+06
G10	CM3 incl 10^4 Mx	6397.89	25.334	25.2832	0.988838	0.0441984	6397.89	33673.1	1000	100	10	336731
G11	CM3 incl 10^4 Mx	6687.83	25.2622	25.2832	0.981731	0.0441984	6687.83	35199.1	1000	100	10	351991
G12	CM3 incl 10^4 Mx	6724.09	25.2534	25.2832	0.987562	0.0441984	6724.09	35389.9	1000	100	10	353899
H1	CM3 incl 10^3 Mx	612.191	29.1355	29.3349	0.977848	0.247473	612.191	3222.06	1000	100	10	32220.6
H2	CM3 incl 10^3 Mx	456.226	29.6119	29.3349	0.987841	0.247473	456.226	2401.19	1000	100	10	24011.9
H3	CM3 incl 10^3 Mx	567.843	29.2574	29.3349	0.986003	0.247473	567.843	2988.65	1000	100	10	29886.5
H4	CM3 incl 10^2 Mx	1088.58	28.2031	28.1878	0.985341	0.0142486	1088.58	5729.38	1000	100	10	57293.8
H5	CM3 incl 10^2 Mx	1107.69	28.1749	28.1878	0.985998	0.0142486	1107.69	5829.94	1000	100	10	58299.4
H6	CM3 incl 10^2 Mx	1100.56	28.1854	28.1878	0.988236	0.0142486	1100.56	5792.42	1000	100	10	57924.2
H7	Mx CTL		Undetermined		0
H8	Mx CTL		Undetermined		0
H9	Mx CTL		Undetermined		0

## Sheet: Ralstonia picketii
Well Position	Sample	Quantity	Cq	Cq Mean	Cq Confidence	Cq SD	Copy No in 9.5uL	Copy No in 50 ul (Maxwell)	CFAC or inoculum volume	Volume used for DNA extraction	Constant to back calculate the value	Copy number per concentrate
A1	100000	100000	18.5237	20.708	0.96468	1.92363
A2	100000	100000	21.451	20.708	0.992532	1.92363
A3	100000	100000	22.1493	20.708	0.991027	1.92363
A4	10000	10000	25.6383	25.5761	0.995134	0.395176
A5	10000	10000	25.1535	25.5761	0.991655	0.395176
A6	10000	10000	25.9364	25.5761	0.994598	0.395176
A7	1000	1000	29.175	29.1557	0.991822	0.164669
A8	1000	1000	29.3099	29.1557	0.991892	0.164669
A9	1000	1000	28.9823	29.1557	0.992332	0.164669
A10	100	100	32.7188	32.5212	0.985391	0.186382
A11	100	100	32.4963	32.5212	0.98314	0.186382
A12	100	100	32.3485	32.5212	0.982625	0.186382
B1	10	10	36.5991	36.6153	0.948927	0.337332																												CFU
B2	10	10	36.2863	36.6153	0.956814	0.337332
B3	10	10	36.9604	36.6153	0.948164	0.337332																												Rep 1	Rep 2	Rep 3
B4	1	1	Undetermined	38	0																						qPCR						10^2	0.561628	0.477108	0.180462	0.406399
B5	1	1	38	38	0.87106																												10^3	0.527602	0.401166	0.462304	0.463691
B6	1	1	Undetermined	38	0											CFAC	inoculum	delta Cq			CFAC	inoculum	% recovery				Rep 1	Rep 2	Rep 3				10^4	0.634932	0.348333	0.484	0.489088
B7	Rp1 CFAC 10^5 Mx	5242.6	26.1361	26.1178	0.994074	0.0542612	5242.6	27592.6	400	100	4	110370		Biological replicate 1	Rp1 CFAC 10^5 Mx	26.1361	26.6177	-0.481537	~100-1000	Rp1 CFAC 10^5 Mx	110370	204311	0.540208	0.556704		10^2	1.5647	0.500204		1.03245			10^5	0.501266	0.670213	0.168	0.446493
B8	Rp1 CFAC 10^5 Mx	5163.51	26.1605	26.1178	0.987802	0.0542612	5163.51	27176.4	400	100	4	108705			Rp1 CFAC 10^5 Mx	26.1605	26.5767	-0.416241		Rp1 CFAC 10^5 Mx	108705	209597	0.518639			10^3	0.374402	0.548032	1.38542	0.769285
B9	Rp1 CFAC 10^5 Mx	5508.91	26.0567	26.1178	0.987372	0.0542612	5508.91	28994.3	400	100	4	115977			Rp1 CFAC 10^5 Mx	26.0567	26.7363	-0.679569		Rp1 CFAC 10^5 Mx	115977	189733	0.611266			10^4	0.4951	0.195616	0.951812	0.547509
B10	Rp1 CFAC 10^4 Mx	622.447	29.5509	29.4766	0.99093	0.0772238	622.447	3276.03	450	100	4.5	14742.2			Rp1 CFAC 10^4 Mx	29.5509	29.6684	-0.117451	~100	Rp1 CFAC 10^4 Mx	14742.2	30445.1	0.48422	0.4951		10^5	0.556704	0.481557	0.653824	0.564028
B11	Rp1 CFAC 10^4 Mx	649.834	29.4819	29.4766	0.992837	0.0772238	649.834	3420.18	450	100	4.5	15390.8			Rp1 CFAC 10^4 Mx	29.4819	29.6874	-0.205488		Rp1 CFAC 10^4 Mx	15390.8	30085.7	0.511566
B12	Rp1 CFAC 10^4 Mx	685.303	29.3968	29.4766	0.987092	0.0772238	685.303	3606.86	450	100	4.5	16230.9			Rp1 CFAC 10^4 Mx	29.3968	29.5316	-0.13487		Rp1 CFAC 10^4 Mx	16230.9	33157.2	0.489512
C1	Rp1 CFAC 10^3 Mx	58.8221	33.3315	33.3134	0.980718	0.0157379	58.8221	309.59	550	100	5.5	1702.74			Rp1 CFAC 10^3 Mx	33.3315	33.0558	0.275685	10-100	Rp1 CFAC 10^3 Mx	1702.74	3677.05	0.463073	0.374402
C2	Rp1 CFAC 10^3 Mx	59.8811	33.3029	33.3134	0.976262	0.0157379	59.8811	315.164	550	100	5.5	1733.4			Rp1 CFAC 10^3 Mx	33.3029	32.5946	0.708286		Rp1 CFAC 10^3 Mx	1733.4	4903.3	0.353517
C3	Rp1 CFAC 10^3 Mx	59.7726	33.3058	33.3134	0.989725	0.0157379	59.7726	314.593	550	100	5.5	1730.26			Rp1 CFAC 10^3 Mx	33.3058	32.3694	0.936378		Rp1 CFAC 10^3 Mx	1730.26	5643.09	0.306616
C4	Rp1 CFAC 10^2 Mx	15.8257	35.4354	36.3661	0.97313	0.818048	15.8257	83.2934	350	40	8.75	728.817			Rp1 CFAC 10^2 Mx	35.4354	37.6636	-2.22823	less than 10	Rp1 CFAC 10^2 Mx	728.817	207.366	3.51463	1.5647
C5	Rp1 CFAC 10^2 Mx	7.22549	36.6918	36.3661	0.959717	0.818048	7.22549	38.0289	350	40	8.75	332.753			Rp1 CFAC 10^2 Mx	36.6918	36.0937	0.598075		Rp1 CFAC 10^2 Mx	332.753	552.329	0.602454
C6	Rp1 CFAC 10^2 Mx	6.06949	36.9711	36.3661	0.948425	0.818048	6.06949	31.9447	350	40	8.75	279.516			Rp1 CFAC 10^2 Mx	36.9711	36.3039	0.667228		Rp1 CFAC 10^2 Mx	279.516	484.423	0.577009
C7	Rp1 incl 10^5 Mx	3881.91	26.6177	26.6436	0.990265	0.0828741	3881.91	20431.1	1000	100	10	204311											#DIV/0!
C8	Rp1 incl 10^5 Mx	3982.35	26.5767	26.6436	0.991199	0.0828741	3982.35	20959.7	1000	100	10	209597		Biological replicate 2	Rp2 CFAC 10^5 Mx	26.0728	26.6359	-0.563041	~100-1000	Rp2 CFAC 10^5 Mx	100467	202007	0.497345	0.481557
C9	Rp1 incl 10^5 Mx	3604.92	26.7363	26.6436	0.990575	0.0828741	3604.92	18973.3	1000	100	10	189733			Rp2 CFAC 10^5 Mx	26.0929	26.5873	-0.494457		Rp2 CFAC 10^5 Mx	99217.4	208217	0.476509
C10	Rp1 incl 10^4 Mx	578.458	29.6684	29.6292	0.989635	0.0849801	578.458	3044.51	1000	100	10	30445.1			Rp2 CFAC 10^5 Mx	26.1984	26.6736	-0.475197		Rp2 CFAC 10^5 Mx	92894.9	197306	0.470816
C11	Rp1 incl 10^4 Mx	571.627	29.6874	29.6292	0.991891	0.0849801	571.627	3008.57	1000	100	10	30085.7			Rp2 CFAC 10^4 Mx	30.2934	29.6729	0.620511	~100	Rp2 CFAC 10^4 Mx	6478.38	30360.3	0.213383	0.195616
C12	Rp1 incl 10^4 Mx	629.987	29.5316	29.6292	0.986572	0.0849801	629.987	3315.72	1000	100	10	33157.2			Rp2 CFAC 10^4 Mx	30.3157	29.3002	1.01559		Rp2 CFAC 10^4 Mx	6388.57	38310.2	0.166759
D1	Rp1 incl 10^3 Mx	69.864	33.0558	32.6733	0.978398	0.349889	69.864	367.705	1000	100	10	3677.05			Rp2 CFAC 10^4 Mx	30.045	29.3736	0.671463		Rp2 CFAC 10^4 Mx	7564.32	36594.7	0.206705
D2	Rp1 incl 10^3 Mx	93.1628	32.5946	32.6733	0.982858	0.349889	93.1628	490.33	1000	100	10	4903.3			Rp2 CFAC 10^3 Mx	32.7787	34.1501	-1.37142	10-100	Rp2 CFAC 10^3 Mx	1748.42	1857.45	0.941299	0.548032
D3	Rp1 incl 10^3 Mx	107.219	32.3694	32.6733	0.983596	0.349889	107.219	564.309	1000	100	10	5643.09			Rp2 CFAC 10^3 Mx	32.9082	32.7711	0.137098		Rp2 CFAC 10^3 Mx	1612.73	4391.94	0.367202
D4	Rp1 incl 10^2 Mx	3.93996	37.6636	36.6871	0.910294	0.852204	3.93996	20.7366	1000	100	10	207.366			Rp2 CFAC 10^3 Mx	32.841	32.5596	0.281342		Rp2 CFAC 10^3 Mx	1681.8	5011.42	0.335593
D5	Rp1 incl 10^2 Mx	10.4943	36.0937	36.6871	0.960064	0.852204	10.4943	55.2329	1000	100	10	552.329			Rp2 CFAC 10^2 Mx	35.9898	Undetermined	#VALUE!	less than 10	Rp2 CFAC 10^2 Mx	261.913	#VALUE!	#VALUE!	0.500204
D6	Rp1 incl 10^2 Mx	9.20403	36.3039	36.6871	0.961168	0.852204	9.20403	48.4423	1000	100	10	484.423			Rp2 CFAC 10^2 Mx	36.3388	34.5815	1.75728		Rp2 CFAC 10^2 Mx	210.665	1419.11	0.148449
D7	Rp2 CFAC 10^5 Mx	5453.95	26.0728	26.1214	0.990416	0.0674616	5453.95	28705	350	100	3.5	100467			Rp2 CFAC 10^2 Mx	35.9405	36.9832	-1.04277		Rp2 CFAC 10^2 Mx	270.109	317.045	0.851959
D8	Rp2 CFAC 10^5 Mx	5386.09	26.0929	26.1214	0.987622	0.0674616	5386.09	28347.8	350	100	3.5	99217.4											#DIV/0!
D9	Rp2 CFAC 10^5 Mx	5042.87	26.1984	26.1214	0.991031	0.0674616	5042.87	26541.4	350	100	3.5	92894.9		Biological replicate 3	Rp3 CFAC 10^5 Mx	27.3473	27.1633	0.184055		Rp3 CFAC 10^5 Mx	90708.6	145355	0.624047	0.653824
D10	Sp2 CFAC 10^4 Mx	391.647	30.2934	30.2181	0.988613	0.150256	391.647	2061.3	220	70	3.14286	6478.38			Rp3 CFAC 10^5 Mx	27.3155	27.375	-0.0594822		Rp3 CFAC 10^5 Mx	92525.6	127363	0.726471
D11	Sp2 CFAC 10^4 Mx	386.218	30.3157	30.2181	0.983891	0.150256	386.218	2032.73	220	70	3.14286	6388.57			Rp3 CFAC 10^5 Mx	27.5871	27.3691	0.218034		Rp3 CFAC 10^5 Mx	78103	127838	0.610954
D12	Sp2 CFAC 10^4 Mx	457.298	30.045	30.2181	0.992487	0.150256	457.298	2406.83	220	70	3.14286	7564.32			Rp3 CFAC 10^4 Mx	28.871	30.5911	-1.72012		Rp3 CFAC 10^4 Mx	16524.5	17117.7	0.965346	0.951812
E1	Rp2 CFAC 10^3 Mx	83.0499	32.7787	32.8426	0.983365	0.0647443	83.0499	437.105	400	100	4	1748.42			Rp3 CFAC 10^4 Mx	28.5964	30.2412	-1.64481		Rp3 CFAC 10^4 Mx	19612.9	21294.6	0.92103
E2	Rp2 CFAC 10^3 Mx	76.6046	32.9082	32.8426	0.979697	0.0647443	76.6046	403.182	400	100	4	1612.73			Rp3 CFAC 10^4 Mx	28.8162	30.5425	-1.72627		Rp3 CFAC 10^4 Mx	17099.7	17645.6	0.969061
E3	Rp2 CFAC 10^3 Mx	79.8855	32.841	32.8426	0.983224	0.0647443	79.8855	420.45	400	100	4	1681.8			Rp3 CFAC 10^3 Mx	33.0254	34.1591	-1.13376		Rp3 CFAC 10^3 Mx	1798.82	1847.08	0.973873	1.38542
E4	Rp2 CFAC 10^2 Mx	11.1968	35.9898	36.0897	0.96956	0.217122	11.1968	58.9305	400	90	4.44444	261.913			Rp3 CFAC 10^3 Mx	32.5731	34.4434	-1.87026		Rp3 CFAC 10^3 Mx	2385.31	1546.84	1.54205
E5	Rp2 CFAC 10^2 Mx	9.00592	36.3388	36.0897	0.960617	0.217122	9.00592	47.3996	400	90	4.44444	210.665			Rp3 CFAC 10^3 Mx	32.3846	34.3538	-1.96927		Rp3 CFAC 10^3 Mx	2683.19	1635.75	1.64034
E6	Rp2 CFAC 10^2 Mx	11.5472	35.9405	36.0897	0.960892	0.217122	11.5472	60.7746	400	90	4.44444	270.109			Rp3 CFAC 10^2 Mx	Undetermined	Undetermined	#VALUE!		Rp3 CFAC 10^2 Mx	#VALUE!	#VALUE!	#VALUE!	#VALUE!
E7	Rp2 incl 10^5 Mx	3838.14	26.6359	26.6323	0.994322	0.0432401	3838.14	20200.7	1000	100	10	202007			Rp3 CFAC 10^2 Mx	36.2509	Undetermined	#VALUE!		Rp3 CFAC 10^2 Mx	255.359	#VALUE!	#VALUE!
E8	Rp2 incl 10^5 Mx	3956.13	26.5873	26.6323	0.993104	0.0432401	3956.13	20821.7	1000	100	10	208217			Rp3 CFAC 10^2 Mx	35.9239	Undetermined	#VALUE!		Rp3 CFAC 10^2 Mx	313.171	#VALUE!	#VALUE!
E9	Rp2 incl 10^5 Mx	3748.82	26.6736	26.6323	0.991644	0.0432401	3748.82	19730.6	1000	100	10	197306
E10	Rp2 incl 10^4 Mx	576.846	29.6729	29.4489	0.992573	0.197433	576.846	3036.03	1000	100	10	30360.3
E11	Rp2 incl 10^4 Mx	727.894	29.3002	29.4489	0.987293	0.197433	727.894	3831.02	1000	100	10	38310.2
E12	Rp2 incl 10^4 Mx	695.3	29.3736	29.4489	0.99017	0.197433	695.3	3659.47	1000	100	10	36594.7
F1	Rp2 incl 10^3 Mx	35.2916	34.1501	33.1603	0.975088	0.863734	35.2916	185.745	1000	100	10	1857.45
F2	Rp2 incl 10^3 Mx	83.4468	32.7711	33.1603	0.981332	0.863734	83.4468	439.194	1000	100	10	4391.94
F3	Rp2 incl 10^3 Mx	95.217	32.5596	33.1603	0.957947	0.863734	95.217	501.142	1000	100	10	5011.42
F4	Rp2 incl 10^2 Mx		Undetermined	35.7824	0	1.69828		#VALUE!	1000	100	10	#VALUE!
F5	Rp2 incl 10^2 Mx	26.9631	34.5815	35.7824	0.975315	1.69828	26.9631	141.911	1000	100	10	1419.11
F6	Rp2 incl 10^2 Mx	6.02386	36.9832	35.7824	0.930698	1.69828	6.02386	31.7045	1000	100	10	317.045
F7	Rp3 CFAC 10^5 Mx	2462.09	27.3473	27.4167	0.990353	0.14846	2462.09	12958.4	700	100	7	90708.6
F8	Rp3 CFAC 10^5 Mx	2511.41	27.3155	27.4167	0.988846	0.14846	2511.41	13217.9	700	100	7	92525.6
F9	Rp3 CFAC 10^5 Mx	2119.94	27.5871	27.4167	0.990731	0.14846	2119.94	11157.6	700	100	7	78103
F10	Rp3 CFAC 10^4 Mx	951.411	28.871	28.7612	0.991561	0.14531	951.411	5007.42	330	100	3.3	16524.5
F11	Rp3 CFAC 10^4 Mx	1129.23	28.5964	28.7612	0.990528	0.14531	1129.23	5943.31	330	100	3.3	19612.9
F12	Rp3 CFAC 10^4 Mx	984.528	28.8162	28.7612	0.992525	0.14531	984.528	5181.73	330	100	3.3	17099.7
G1	Rp3 CFAC 10^3 Mx	71.2035	33.0254	32.661	0.977316	0.329315	71.2035	374.755	480	100	4.8	1798.82
G2	Rp3 CFAC 10^3 Mx	94.4185	32.5731	32.661	0.978535	0.329315	94.4185	496.94	480	100	4.8	2385.31
G3	Rp3 CFAC 10^3 Mx	106.21	32.3846	32.661	0.981271	0.329315	106.21	558.999	480	100	4.8	2683.19
G4	Rp3 CFAC 10^2 Mx		Undetermined	36.0874	0	0.23125		#VALUE!	510	100	5.1	#VALUE!
G5	Rp3 CFAC 10^2 Mx	9.51337	36.2509	36.0874	0.96388	0.23125	9.51337	50.0704	510	100	5.1	255.359
G6	Rp3 CFAC 10^2 Mx	11.6672	35.9239	36.0874	0.967482	0.23125	11.6672	61.4061	510	100	5.1	313.171
G7	Rp3 incl 10^5 Mx	2761.75	27.1633	27.3025	0.995416	0.120573	2761.75	14535.5	1000	100	10	145355
G8	Rp3 incl 10^5 Mx	2419.9	27.375	27.3025	0.992745	0.120573	2419.9	12736.3	1000	100	10	127363
G9	Rp3 incl 10^5 Mx	2428.92	27.3691	27.3025	0.992254	0.120573	2428.92	12783.8	1000	100	10	127838
G10	Rp3 incl 10^4 Mx	325.236	30.5911	30.4583	0.992528	0.189525	325.236	1711.77	1000	100	10	17117.7
G11	Rp3 incl 10^4 Mx	404.597	30.2412	30.4583	0.989085	0.189525	404.597	2129.46	1000	100	10	21294.6
G12	Rp3 incl 10^4 Mx	335.267	30.5425	30.4583	0.988083	0.189525	335.267	1764.56	1000	100	10	17645.6
H1	Rp3 incl 10^3 Mx	35.0946	34.1591	34.3188	0.983438	0.145342	35.0946	184.708	1000	100	10	1847.08
H2	Rp3 incl 10^3 Mx	29.3899	34.4434	34.3188	0.971265	0.145342	29.3899	154.684	1000	100	10	1546.84
H3	Rp3 incl 10^3 Mx	31.0793	34.3538	34.3188	0.975162	0.145342	31.0793	163.575	1000	100	10	1635.75
H4	Rp3 incl 10^2 Mx		Undetermined		0			#VALUE!	1000	100	10	#VALUE!
H5	Rp3 incl 10^2 Mx		Undetermined		0			#VALUE!	1000	100	10	#VALUE!
H6	Rp3 incl 10^2 Mx		Undetermined		0			#VALUE!	1000	100	10	#VALUE!
H7	MX control		Undetermined		0
H8	MX control		Undetermined		0
H9	MX control		Undetermined		0
