# Supplementary material for: Microbial Detection and Quantification of Low-Biomass Water Samples Using an International Space Station Smart Sample Concentrator
Source: Microorganisms. 2023 Sep 13;11(9):2310. doi: 10.3390/microorganisms11092310 (PMC10537578; doi:10.3390/microorganisms11092310)
Supplement: Supplementary file 1 [file microorganisms-11-02310-s001.zip › Supplementary Table S2_CFU_results.xlsx]

## Sheet: Ralstonia
Table S2. CFU results for Sphingomonas paucimobilis, Ralstonia pickettii and Cupriavidus basilensis
Ralstonia	Rep 1
Cell/L	CFAC CFU		Average CFAC CFU	Volume plated for each plate	Total CFAC volume	Concentration factor	Total CFAC CFU		% recovery					Comments
10^2	72	66	69	100	350	3.5	241.5		0.561628					10^2 plated 100 uL
10^3	214	210	212	50	550	11	2332		0.527602					10^3 plated 50 uL
10^4	48	55	51.5	100	450	4.5	23175		0.634932					10^4 plated 100 uL of 10^-2 dilution
10^5	40	59	49.5	100	400	4	198000		0.501266					10^5 plated 100 of 10^-3 dilution
Cell/mL	Inoculum CFU		Average inoculum CFU	Total inoculum CFU
10^2	35	51	43	430
10^3	218	224	221	4420
10^4	36	37	36.5	36500
10^5	44	35	39.5	395000
Ralstonia	Rep 2
Cell/L	CFAC CFU		Average CFAC CFU	Volume plated for each plate	Total CFAC volume	Concentration factor	Total CFAC CFU		% recovery
10^2	52	47	49.5	100	400	4	198		0.477108
10^3	172	172	172	50	400	8	1376		0.401166
10^4	53	61	57	100	220	2.2	12540		0.348333
10^5	45	45	45	100	350	3.5	157500		0.670213
Cell/mL	Inoculum CFU		Average inoculum CFU	Total inoculum CFU
10^2	35	48	41.5	415
10^3	163	180	171.5	3430
10^4	36	36	36	36000
10^5	26	21	23.5	235000
Ralstonia	Rep 3
Cell/L	CFAC CFU		Average CFAC CFU	Volume plated for each plate	Total CFAC volume	Concentration factor	Total CFAC CFU		% recovery
10^2	26	20	23	100	510	5.1	117.3		0.180462
10^3	210	208	209	50	480	9.6	2006.4		0.462304
10^4	76	56	66	100	330	3.3	21780		0.484		0.489088
10^5	12	6	9	100	700	7	63000		0.168
Cell/mL	Inoculum CFU		Average inoculum CFU	Total inoculum CFU
10^2	71	59	65	650
10^3	220	214	217	4340
10^4	43	47	45	45000
10^5	57	18	37.5	375000

## Sheet: Cupriavidus
Cupriavidus	Rep 1
Cell/L	CFAC CFU		Average CFAC CFU	Volume plated for each plate	Total CFAC volume	Concentration factor	Total CFAC CFU		% recovery					Comments
10^2	15	14	14.5	100	870	8.7	126.15		0.376567					10^2 plated 100 uL
10^3	251	252	251.5	50	400	8	2012		0.636709					10^3 plated 50 uL
10^4	28	29	28.5	100	530	5.3	15105		0.580962					10^4 plated 100 uL of 10^-2 dilution
10^5	30	24	27	100	490	4.9	132300		0.55125					10^5 plated 100 of 10^-3 dilution
Cell/mL	Inoculum CFU		Average inoculum CFU	Total inoculum CFU
10^2	27	40	33.5	335
10^3	163	153	158	3160
10^4	27	25	26	26000
10^5	24	24	24	240000
Cupriavidus	Rep 2
Cell/L	CFAC CFU		Average CFAC CFU	Volume plated for each plate	Total CFAC volume	Concentration factor	Total CFAC CFU		% recovery
10^2	9	7	8	100	890	8.9	71.2		0.418824
10^3	198	178	188	50	350	7	1316		0.629665
10^4	18	31	24.5	100	330	3.3	8085		0.598889
10^5	20	24	22	100	510	5.1	112200		0.801429
Cell/mL	Inoculum CFU		Average inoculum CFU	Total inoculum CFU
10^2	17	17	17	170
10^3	95	114	104.5	2090
10^4	14	13	13.5	13500
10^5	19	9	14	140000
Cupriavidus	Rep 3	Camilla's
Cell/L	CFAC CFU		Average CFAC CFU	Volume plated for each plate	Total CFAC volume	Concentration factor	Total CFAC CFU		% recovery
10^2	28	32	30	100	510	5.1	153		0.665217
10^3	114	120	117	25	260	10.4	1216.8		0.2704
10^4	18	16	17	100	450	4.5	7650		0.347727		0.509193
10^5	20	22	21	100	300	3	63000		0.3
Cell/mL	Inoculum CFU		Average inoculum CFU	Total inoculum CFU
10^2	24	22	23	230
10^3	109	116	112.5	4500	* 25 uL plated
10^4	25	19	22	22000
10^5	21	21	21	210000

## Sheet: Sphingomonas
Sphingomonas	Rep 1	Camilla's
Cell/L	CFAC CFU		Average CFAC CFU	Volume plated for each plate	Total CFAC volume	Concentration factor	Total CFAC CFU		% recovery					Comments
10^2	110	92	101	100	450	4.5	455		0.54					10^2 plated 100 uL
10^3	201	299	250	100	430	4.3	1080		0.38					10^3 plated 50 uL
10^4	67	84	76	100	370	3.7	27900		0.49					10^4 plated 100 uL of 10^-2 dilution
10^5	76	81	79	100	400	4	314000		0.97					10^5 plated 100 of 10^-3 dilution
Cell/mL	Inoculum CFU		Average inoculum CFU	Total inoculum CFU
10^2	85	84	85	845
10^3	290	283	287	2870
10^4	57	56	57	56500
10^5	24	41	33	325000
Sphingomonas	Rep 2
Cell/L	CFAC CFU		Average CFAC CFU	Volume plated for each plate	Total CFAC volume	Concentration factor	Total CFAC CFU		% recovery
10^2	30	40	35	100	680	6.8	238		0.44
10^3	400	408	404	100	370	3.7	1490		0.4
10^4	78	92	85	100	390	3.9	33200		0.87
10^5	64	82	73	100	430	4.3	314000		0.79
Cell/mL	Inoculum CFU		Average inoculum CFU	Total inoculum CFU
10^2	55	53	54	540
10^3	344	412	378	3780
10^4	36	40	38	38000
10^5	40	39	40	395000
Sphingomonas	Rep 3	Camilla's
Cell/L	CFAC CFU		Average CFAC CFU	Volume plated for each plate	Total CFAC volume	Concentration factor	Total CFAC CFU		% recovery
10^2	39	52	46	100	430	4.3	196		0.4
10^3	190	216	203	50	290	5.8	1180		0.35
10^4	57	35	46	100	580	5.8	26700		0.68		0.68
10^5	73	46	60	100	570	5.7	339000		0.67
Cell/mL	Inoculum CFU		Average inoculum CFU	Total inoculum CFU
10^2	52	47	50	495
10^3	199	136	168	3350
10^4	44	35	40	39500
10^5	38	64	51	510000
